# Supplementary material
Source: PubMed Central journal article supplement (PMC3888123)
Supplement: supp_ddt326_ddt326supp.pdf [file supp_ddt326_ddt326supp.pdf]

## Supplemental Methods - Inclusion and Exclusion Criteria

### Healthy nonsmokers

#### Inclusion criteria

- Males and females, at least 18 years old
- Provide informed consent
- Normal physical examination
- HIV1 negative
- Not pregnant (females)
- Good health without history of chronic lung disease, including asthma, and without recurrent or recent (within 3 months) acute pulmonary disease
- Normal routine laboratory evaluation, including general hematologic studies, general serologic/immunologic studies, general biochemical analyses, and urine analysis
- Normal PA and lateral chest X-ray
- Normal electrocardiogram (sinus bradycardia, premature atrial contractions are permissible)
- No history of allergies to medications used in the bronchoscopy procedure
- Not taking any medications relevant to lung disease or having an effect on the airway epithelium
- Willingness to participate in the study
- Self-reported nonsmokers, with smoking status validated by the absence of nicotine and cotinine in urine (nicotine<2 ng/ml, cotinine<5 ng/ml)

#### Exclusion criteria

- Unable to meet the inclusion criteria
- Current active infection or acute illness of any kind
- Evidence of malignancy within the past 5 years
- Alcohol or drug abuse within the past 6 months

### Healthy active smokers

#### Inclusion criteria

- Males and females, at least 18 years old
- Provide informed consent
- Normal physical examination
- HIV1 negative
- Not pregnant (females)
- Good health without history of chronic lung disease, including asthma, and without recurrent or recent (within 3 months) acute pulmonary disease
- Normal routine laboratory evaluation, including general hematologic studies, general serologic/immunologic studies, general biochemical analyses, and urine analysis
- Normal PA and lateral chest X-ray
- Normal electrocardiogram (sinus bradycardia, premature atrial contractions are permissible)
- No history of allergies to medications used in the bronchoscopy procedure
- Not taking any medications relevant to lung disease or having an effect on the airway epithelium

- Willingness to participate in the study
- Self-reported current daily smokers with any number of pack-yr, validated by urine nicotine  $\geq 30$  ng/ml and cotinine  $\geq 50$  ng/ml

**Exclusion criteria**

- Unable to meet the inclusion criteria
- Current active infection or acute illness of any kind
- Evidence of malignancy within the past 5 years
- Alcohol or drug abuse within the past 6 months

**Table S1. Primers for EpiTyper Analysis**

| <b>Primer name</b> | <b>Primer sequence (5'-3')</b>                               |
|--------------------|--------------------------------------------------------------|
| ALDH3A1_000_10F    | aggaagagagGGAGAGGTTGTGTTAAAGGTAATTT                          |
| ALDH3A1_000_T7R    | cagtaatacactcactatagggagaaggctCCTTCCTTCCAATCATAAAATCTAA      |
| ALDH3A1_001_10F    | aggaagagagTGTTTTTGGGATTATTATTTTTTGGGA                        |
| ALDH3A1_001_T7R    | cagtaatacactcactatagggagaaggctTACAACATACACTAAAAACCTCCCC      |
| ALDH3A1_002_10F    | aggaagagagGGGGAGGTTTTTAGTGTATGTTGTA                          |
| ALDH3A1_002_T7R    | cagtaatacactcactatagggagaaggctCTAACCCTAATCCCAAACCTTTCTA      |
| ALDH3A1_003_10F    | aggaagagagTTTTTTATTTGGGTTGTTTGTTTTG                          |
| ALDH3A1_003_T7R    | cagtaatacactcactatagggagaaggctTCCATCAACTATCAAATACTACCCC      |
| CYP1B1_000_10F     | aggaagagagGAGTAGTTGGGATTATAGGTGTGTATT                        |
| CYP1B1_000_T7R     | cagtaatacactcactatagggagaaggctTAAAAAACCCAAATACCTTCTTTCC      |
| CYP1B1_001_10F     | aggaagagagGTTTAAGTTTTTTAAAGTGTGGGA                           |
| CYP1B1_001_T7R     | cagtaatacactcactatagggagaaggctTAATAAATTCACCAAAAACAACCCCT     |
| CYP1B1_002_10F     | aggaagagagAGGGTGTTTTTTGGTGAATTTATTA                          |
| CYP1B1_002_T7R     | cagtaatacactcactatagggagaaggctAAACCCTCCCTTTATAAAAAAACCC      |
| SFRP2_000_10F      | aggaagagagAGATTATGAAGGAGGTGTTGGAGTA                          |
| SFRP2_000_T7R      | cagtaatacactcactatagggagaaggctACACCCCAAACAAAATACACTAAA       |
| SFRP2_001_10F      | aggaagagagTTTTGTTTTTTTATTTTTTGTGGG                           |
| SFRP2_001_T7R      | cagtaatacactcactatagggagaaggctACCTCTAACCAAAATACTCACCACA      |
| SFRP2_002_10F      | aggaagagagTTGTTAAAGATGTTAGTATTGGAGTTG                        |
| SFRP2_002_T7R      | cagtaatacactcactatagggagaaggctAAAAAATAATTTCCAAAAATTCCC       |
| RPL26_000_10F      | aggaagagagTTTGTTTTAGTTTTTTGGAAAGAGG                          |
| RPL26_000_T7R      | cagtaatacactcactatagggagaaggctAATCCAATCTTAATTTCCCTCAAACA     |
| RPL26_001_10F      | aggaagagagAATTTTTTAAGTAGTGTGTTGAGGAAA                        |
| RPL26_001_T7R      | cagtaatacactcactatagggagaaggctCAAACCACACTTACCCACTAAAAAA      |
| RPL26_002_10F      | aggaagagagGGGTTTTAAAAGTTTTTTAGTGGGT                          |
| RPL26_002_T7R      | cagtaatacactcactatagggagaaggctTTTATCTATTACTTTCTTAAATCAAAAACC |
| RPL26_003_10F      | aggaagagagGGTTTTTGATTTAAGAAAGTAATAGATAAA                     |
| RPL26_003_T7R      | cagtaatacactcactatagggagaaggctCTAAACAACCTTAACCAATAACCCC      |
| RPL26_004_10F      | aggaagagagGGTTATTGGTTAAGGTTGTTTAGGG                          |
| RPL26_004_T7R      | cagtaatacactcactatagggagaaggctTAATCTAAACCAACACCTCCCAC        |
| RPL26_005_10F      | aggaagagagTTAGAGATTTAGTTTTGGGTGGTGA                          |
| RPL26_005_T7R      | cagtaatacactcactatagggagaaggctCCTATAATCCCAACTACTCAAAAAA      |
| RPL26_006_10F      | aggaagagagTTGTTTTAGTTTTTTGAGTAGTTGGG                         |
| RPL26_006_T7R      | cagtaatacactcactatagggagaaggctACCTCAAAAACCATTTACAAAAACC      |
| RPL26_007_10F      | aggaagagagGGGTTTATTATGTTGGTTAGGTTGG                          |
| RPL26_007_T7R      | cagtaatacactcactatagggagaaggctTAAAATTCCCACAAATTAACCAT        |
| RPL26_008_10F      | aggaagagagGGTTTTTTTTGGGAATTGTATATGG                          |
| RPL26_008_T7R      | cagtaatacactcactatagggagaaggctCCAATCAATACTAACCTCACCTCAA      |
| RPL26_009_10F      | aggaagagagGGAAGATTTTTGAGGTGAGGTTAGT                          |
| RPL26_009_T7R      | cagtaatacactcactatagggagaaggctCAACTCCCTAAAACCTCCAAACC        |

## Supplemental Figure Legends

**Supplemental Figure 1.** HELP probe locations in relation to the transcriptional start site. Y-axis – number of probes; X-axis - the probe distance upstream (- numbers), or downstream (+ numbers) from the transcriptional start site. **A.** All probe locations from the HELP assay are represented regardless of differential methylation. **B.** Probe locations for the 220 differentially methylated probes ( $p < 0.05$ , fold-change  $> \pm 1.5$ ), comparing smokers ( $n=20$ ) to nonsmokers ( $n=19$ ). **C.** Probe locations in relation to the transcriptional start site of the 56 hypermethylated probe sets ( $p < 0.05$ , fold-change  $> \pm 1.5$ ), comparing smokers ( $n=20$ ) to nonsmokers ( $n=19$ ). **D.** Probe locations in relation to the transcriptional start site of the 164 hypomethylated probe sets ( $p < 0.05$ , fold-change  $> \pm 1.5$ ), comparing smokers ( $n=20$ ) to nonsmokers ( $n=19$ ).

**A. All probes**

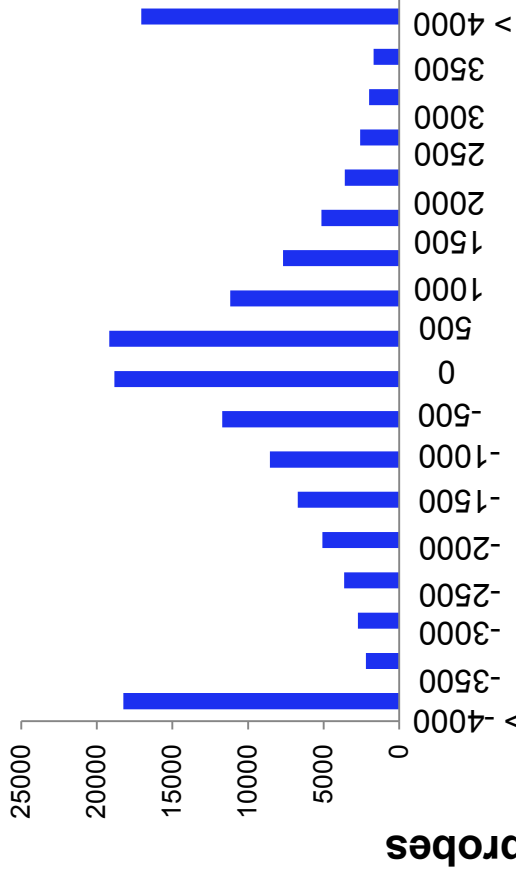

**B. Significant probes**

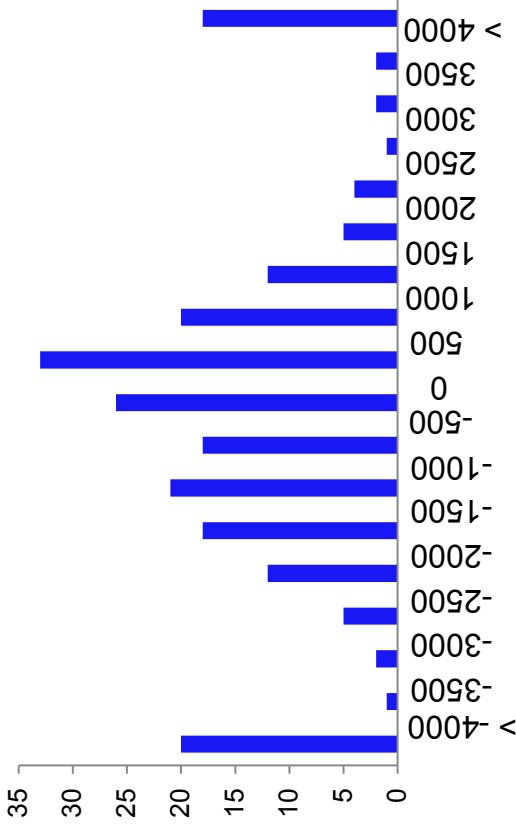

**C. Hypermethylated probes**

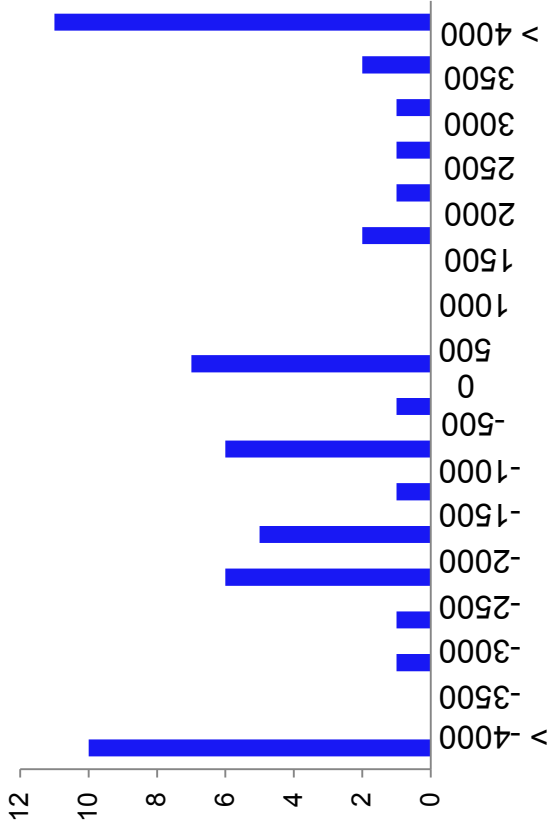

**D. Hypomethylated probes**

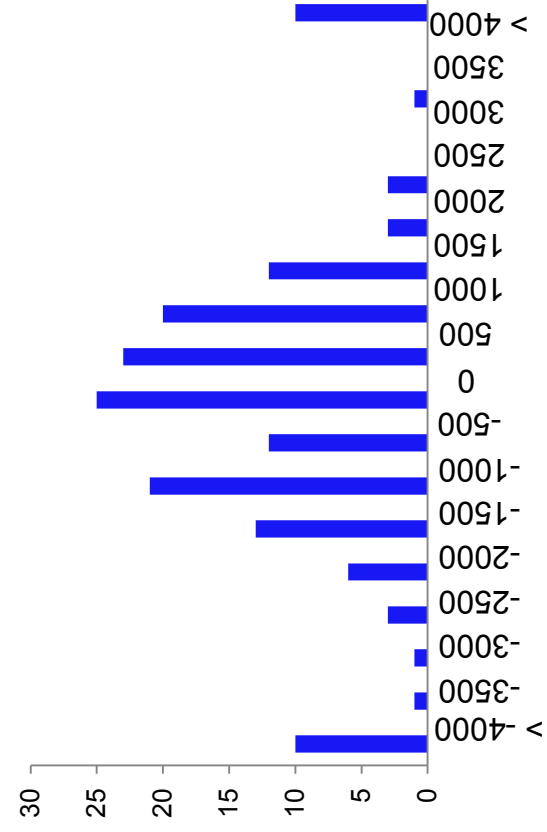

Distance to transcriptional start site
